# Supplementary material for: Dual fluorescent labeling of GLP-1R in live cells via enzymatic tagging and bioorthogonal chemistry
Source: Royal Society of Chemistry journal article supplement (doi:10.1039/d2cb00107a), 2022-01-01
Supplement: d2cb00107a1.pdf [file d2cb00107a1.pdf]

Supporting Information for

**Dual fluorescent labeling of GLP-1R in live cells via enzymatic tagging and bioorthogonal chemistry**

*Tracey M. Lewandowski,<sup>a</sup> Peng An,<sup>a,b</sup> Carlo P. Ramil,<sup>a</sup> Ming Fang<sup>a</sup> and Qing Lin<sup>a,\*</sup>*

<sup>a</sup> Department of Chemistry, State University of New York at Buffalo, Buffalo, New York 14260-3000, United States

<sup>b</sup> Present address: School of Chemical Science and Technology, Yunnan University, Kunming, Yunnan 650500, P. R. China

\*Email: [qinglin@buffalo.edu](mailto:qinglin@buffalo.edu)

**Table of Contents**

Supplemental Figures and Table

|                                                                                                      |         |
|------------------------------------------------------------------------------------------------------|---------|
| <b>Figure S1.</b> Selection of suitable sites for fluorophore placement .....                        | S2      |
| <b>Figure S2.</b> Confocal micrographs of HEK293T cells expressing SNAP-GLP-1R-BocK mutants .....    | S3      |
| <b>Figure S3.</b> cAMP accumulation activity of the SNAP-GLP-1R variants.....                        | S4      |
| <b>Figure S4.</b> Confocal micrographs of HEK293T cells expressing SNAP-GLP-1R WT and mutants .....  | S5      |
| <b>Figure S5.</b> Absorption and emission spectra of FRET pairs .....                                | S6      |
| <b>Figure S6.</b> Micrographs showing SNAP-GLP-1R-T378 biosensor response to GLP-1 stimulation.....  | S7      |
| <b>Figure S7.</b> Micrographs showing SNAP-GLP-1R-T378 biosensor response to OXM-7 stimulation.....  | S8      |
| <b>Figure S8.</b> Micrographs showing SNAP-GLP-1R-R376 biosensor response to GLP-1 stimulation ..... | S9      |
| <b>Figure S9.</b> Micrographs showing SNAP-GLP-1R-R376 biosensor response to OXM-7 stimulation ..... | S10     |
| <b>Table S1.</b> Oligonucleotides used for amber mutations of SNAP-GLP-1R .....                      | S11     |
| Experimental Procedures.....                                                                         | S12-S13 |
| References .....                                                                                     | S13     |

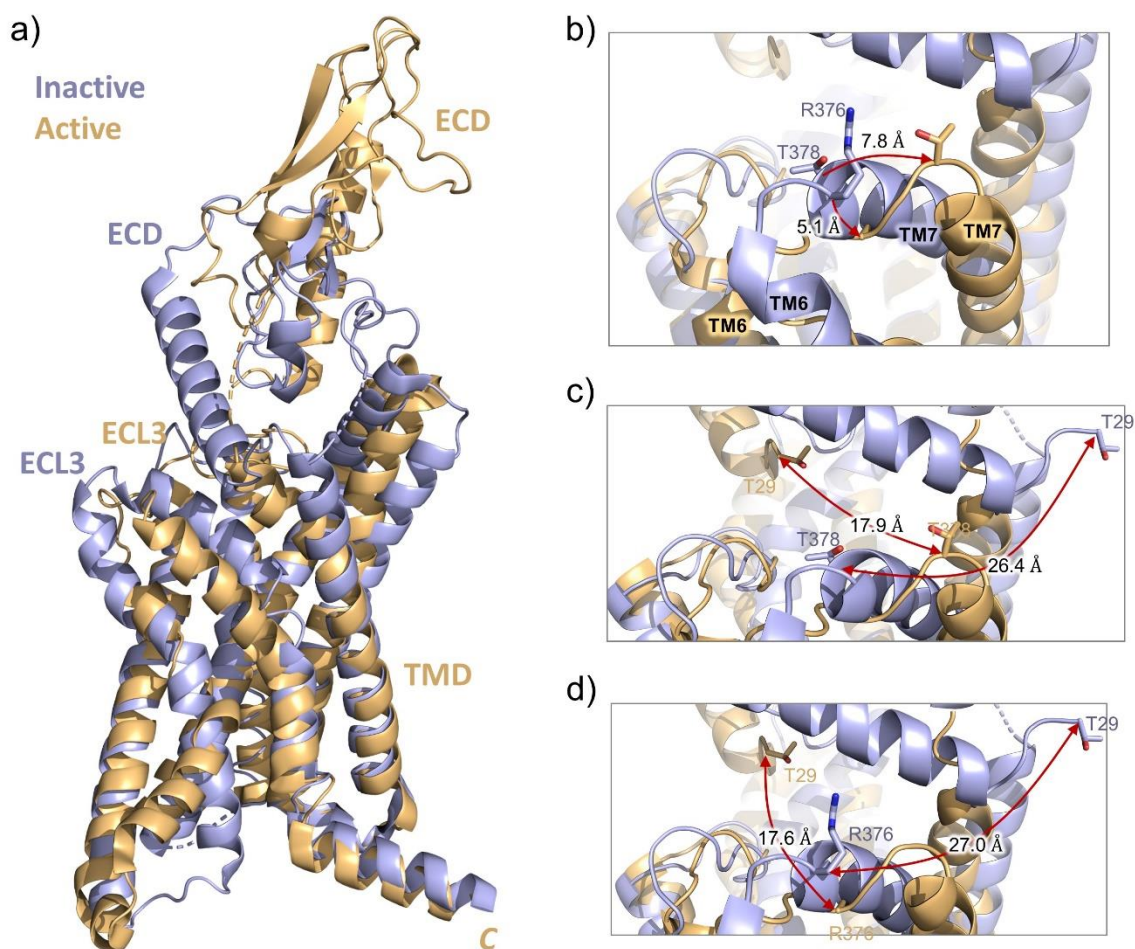

**Figure S1.** Selection of suitable sites for fluorophore placement. (a) Superimposition of the full-length inactive (PDB code: 6LN2)<sup>1</sup> and active (PDB code: 6VAI)<sup>2</sup> conformations of GLP-1R. (b) A close-up view of the ECL3 regions showing significant outward movement of ECL3 including residues R376 and T378 after receptor activation. (c) A close-up view of the distance change between T29 at the N-terminus and T378 at ECL3 showing a decrease of distance from 26.4 Å to 17.9 Å. (d) A close-up view of the distance change between T29 at the N-terminus and R376 at ECL3 showing a decrease of distance from 27.0 Å to 17.6 Å. All distances were measured between the relevant  $\alpha$ -carbons.

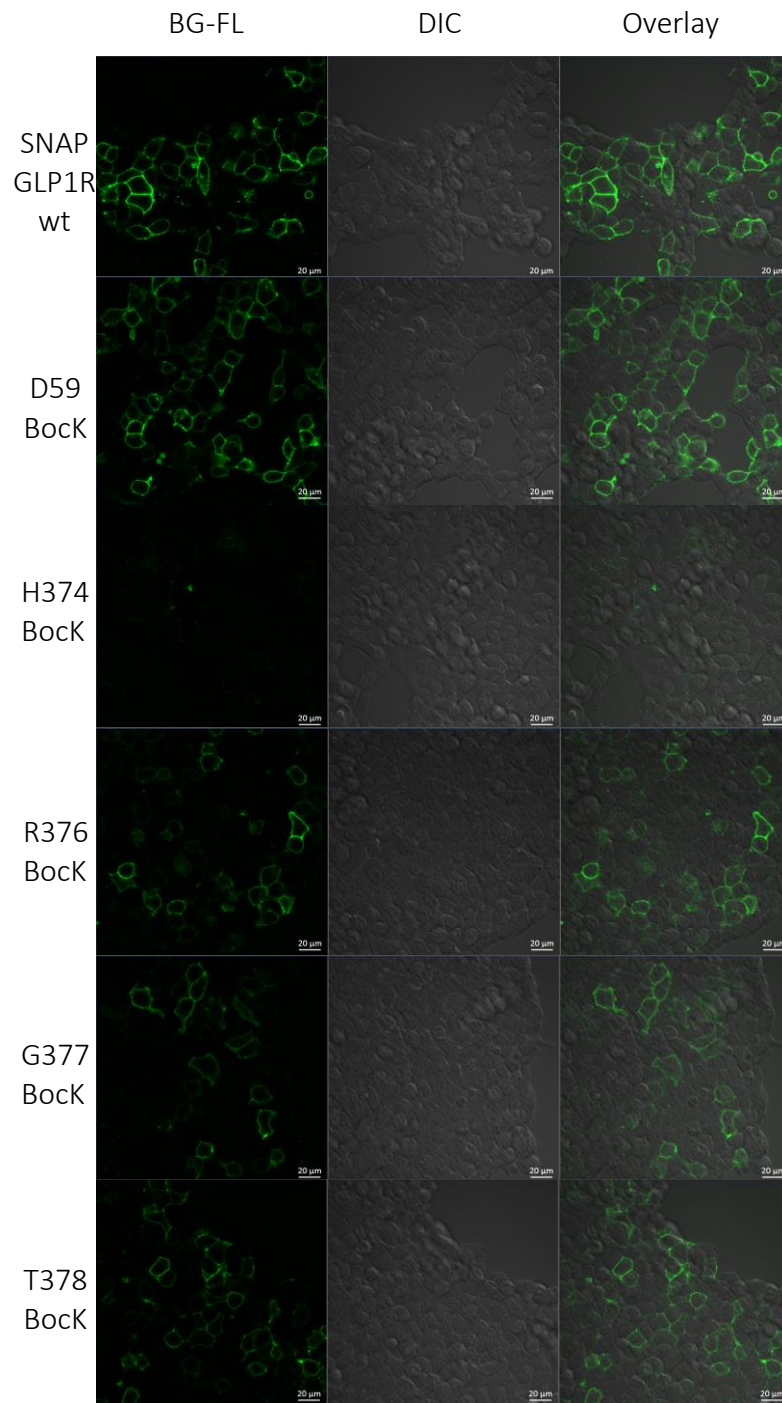

**Figure S2.** Confocal micrographs of HEK293T cells expressing SNAP-GLP-1R WT or mutants encoding Bock at various positions. Cells were treated with 5  $\mu$ M BG-FL for 30 min before image acquisition. Scale bar = 20  $\mu$ m.

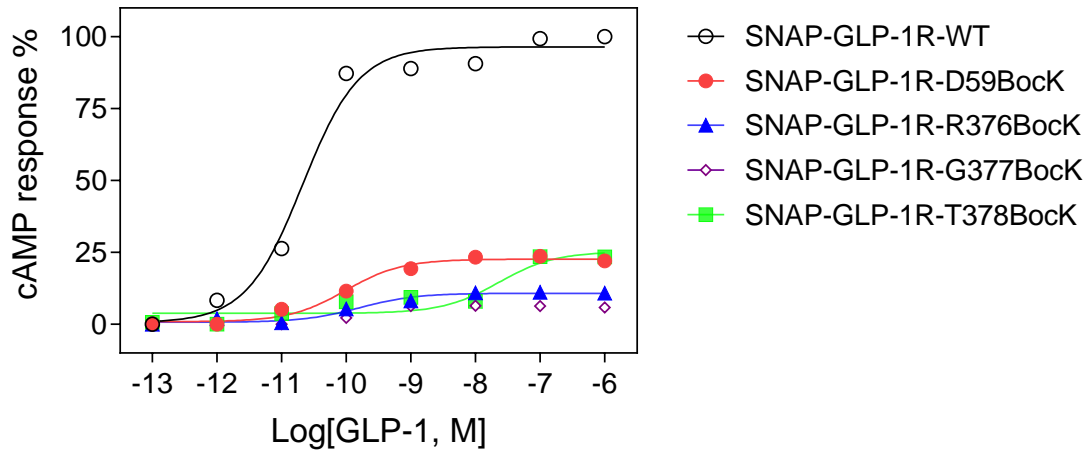

**Figure S3.** cAMP accumulation activity of the WT and BockK-encoded SNAP-GLP-1R mutants.

Data were fitted to the following equation:  $Y = Y_{min} + \frac{(Y_{max} - Y_{min})}{1 + 10^{\log EC_{50} - \log [A]}}$ , where  $Y_{min}$  represents minimal stimulation in the absence of ligand;  $Y_{max}$  represents maximal stimulation in the presence of ligand;  $[A]$  is molar concentration of the ligand, and  $EC_{50}$  represents molar concentration of the ligand required to generate a response halfway between  $Y_{min}$  and  $Y_{max}$ .

a)

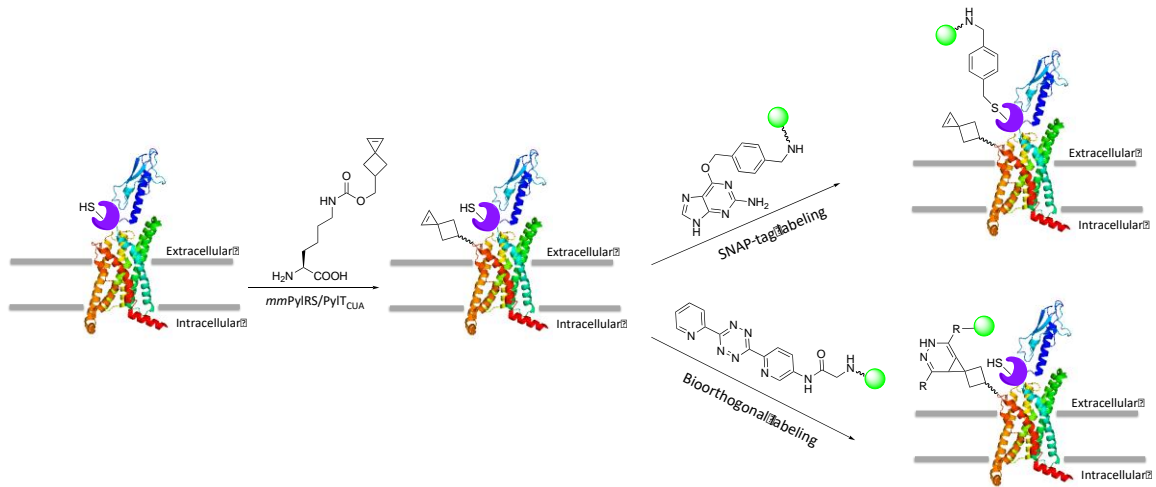

b)

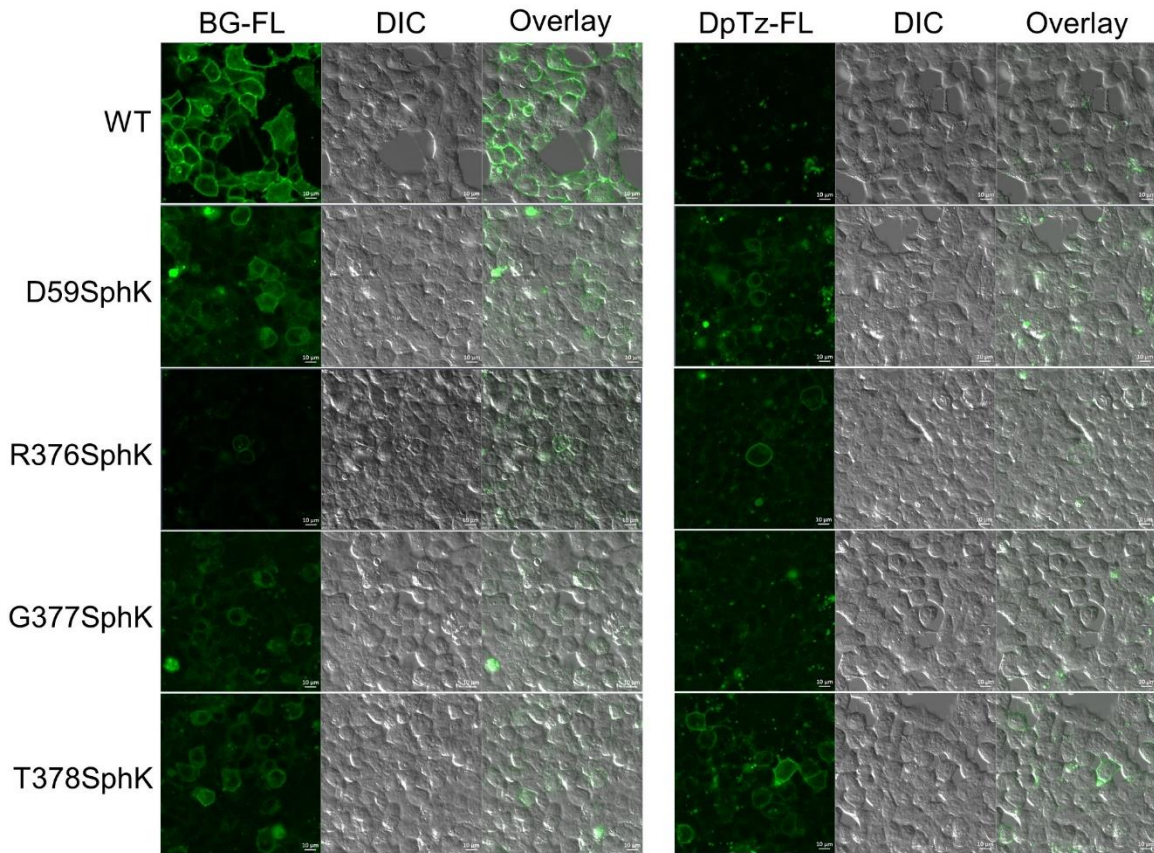

**Figure S4.** (a) Scheme for SphK incorporation and subsequent labeling by either BG-FL or DpTz-FL. (b) Confocal micrographs of HEK293T cells expressing WT SNAP-GLP-1R or mutants encoding SphK at the indicated positions. Cells were treated with 5  $\mu$ M BG-FL (left) for 30 min or 5  $\mu$ M DpTz-FL (right) for 1 h before image acquisition. Scale bar = 10  $\mu$ m.

a)

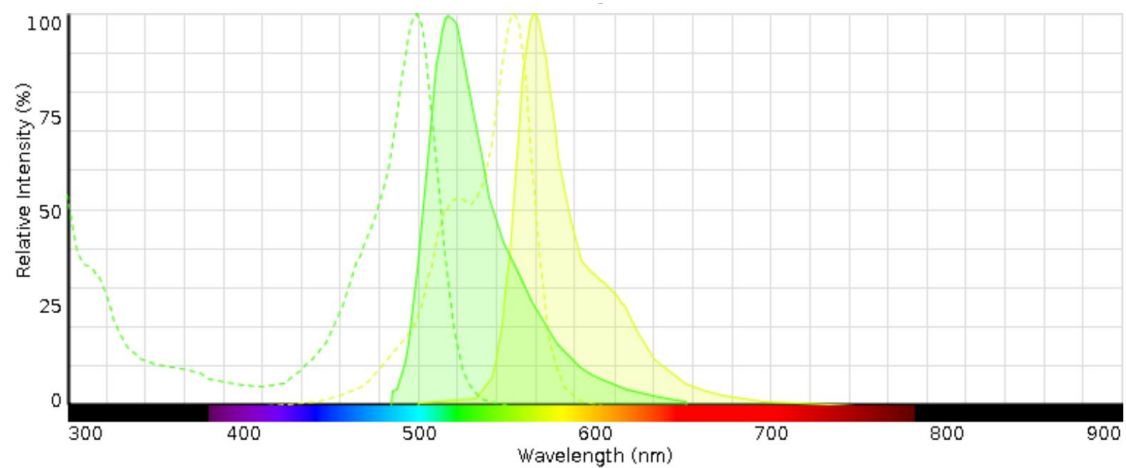

b)

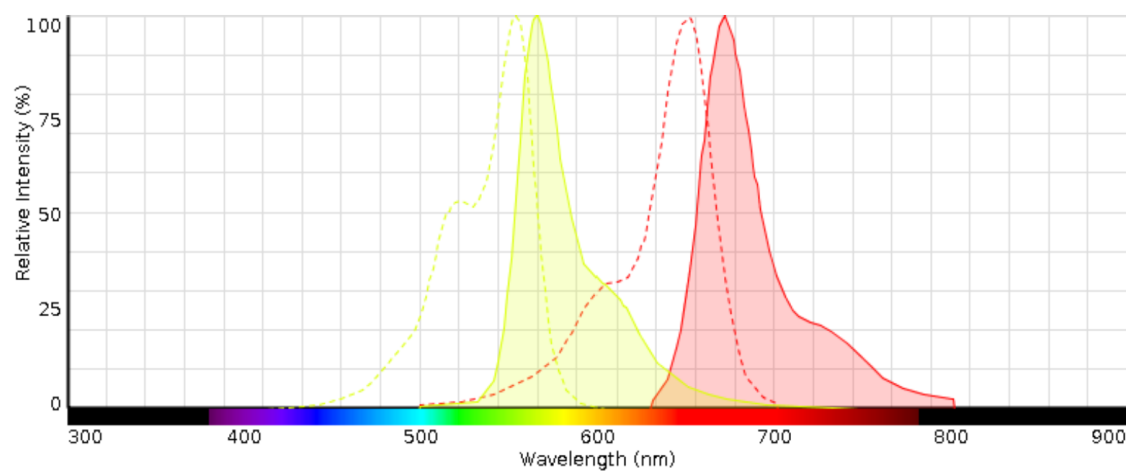

**Figure S5.** Absorption (dash line) and emission (solid line) spectra of (a) fluorescein (FL)/Cy3 dyes and (b) Cy3/AF647 dyes used in the FRET studies.

a)

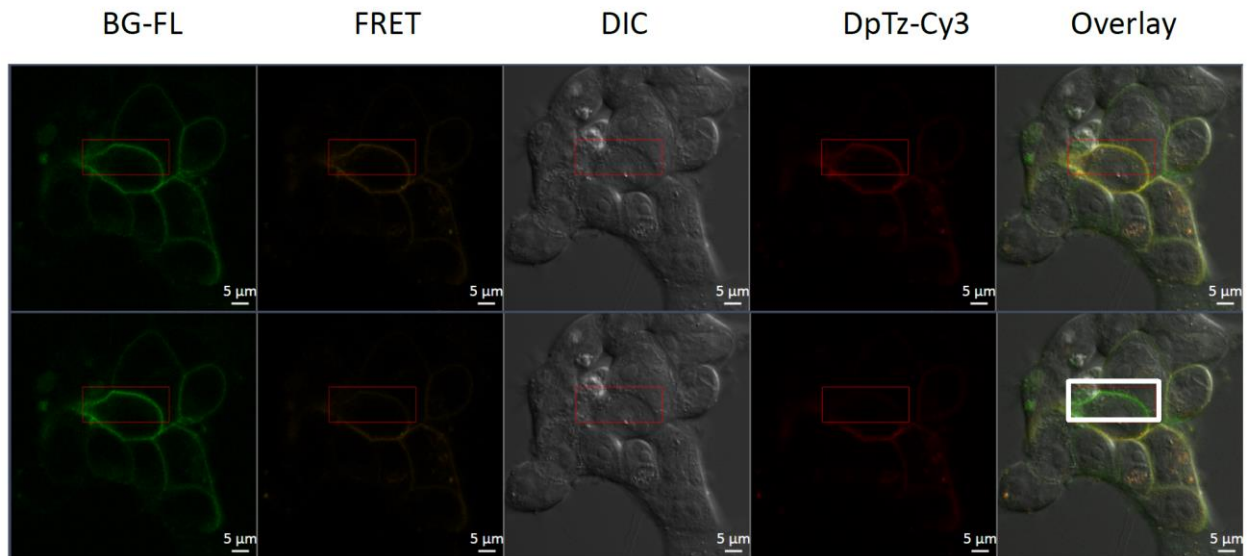

b)

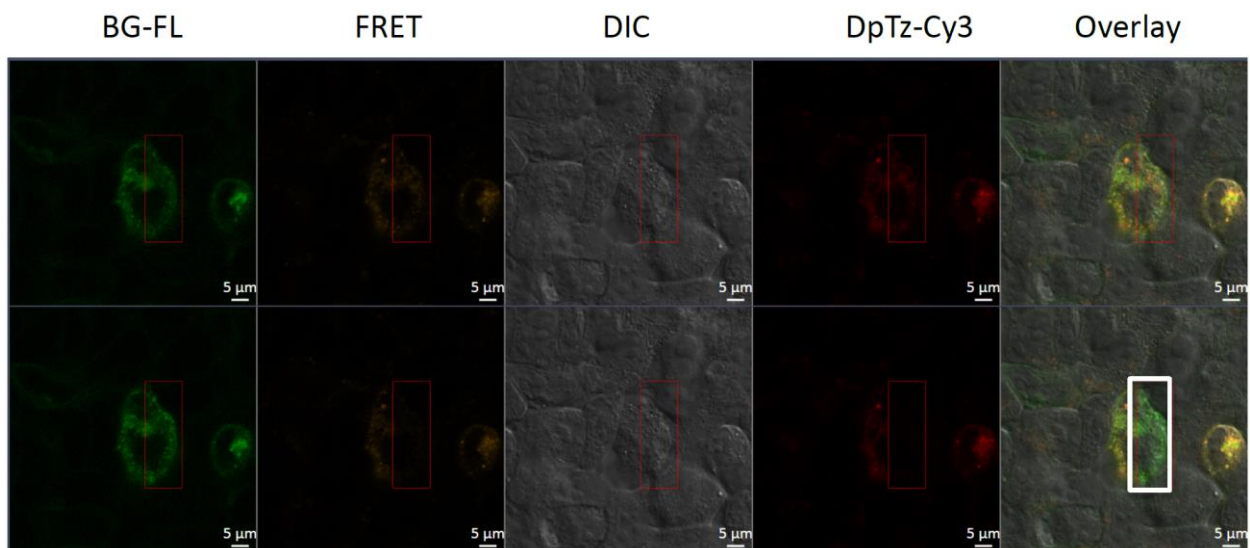

**Figure S6.** Representative confocal micrographs of the dually FL/Cy3-labeled SNAP-GLP-1R-T378 biosensor's response to GLP-1 stimulation: (a) without treatment; (b) with treatment of 10 μM GLP-1 for 10 min. Top-row micrographs were acquired before acceptor photobleaching while bottom-row micrographs were acquired after acceptor photobleaching. White boxes mark the photobleaching regions. Scale bar = 5 μm.

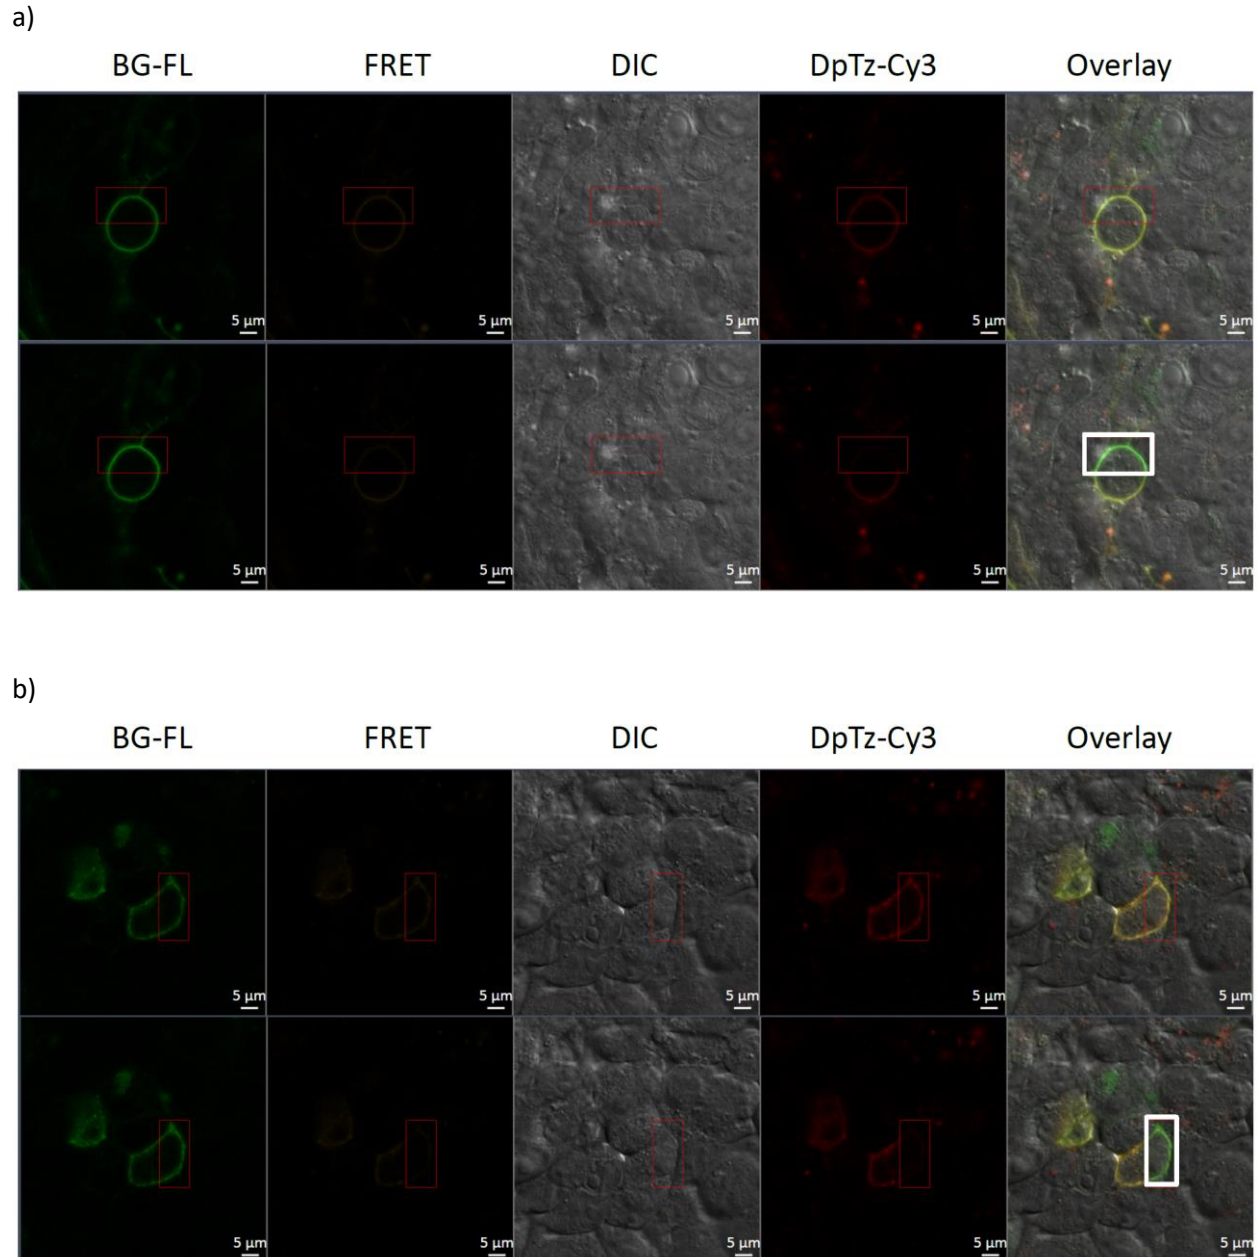

**Figure S7.** Representative confocal micrographs of the dually FL/Cy3-labeled SNAP-GLP-1R-T378 biosensor's response to OXM-7 stimulation: (a) without treatment; (b) with treatment of 10  $\mu$ M OXM-7 for 10 min. Top-row micrographs were acquired before acceptor photobleaching while bottom-row micrographs were acquired after acceptor photobleaching. White boxes mark the photobleaching regions. Scale bar = 5  $\mu$ m.



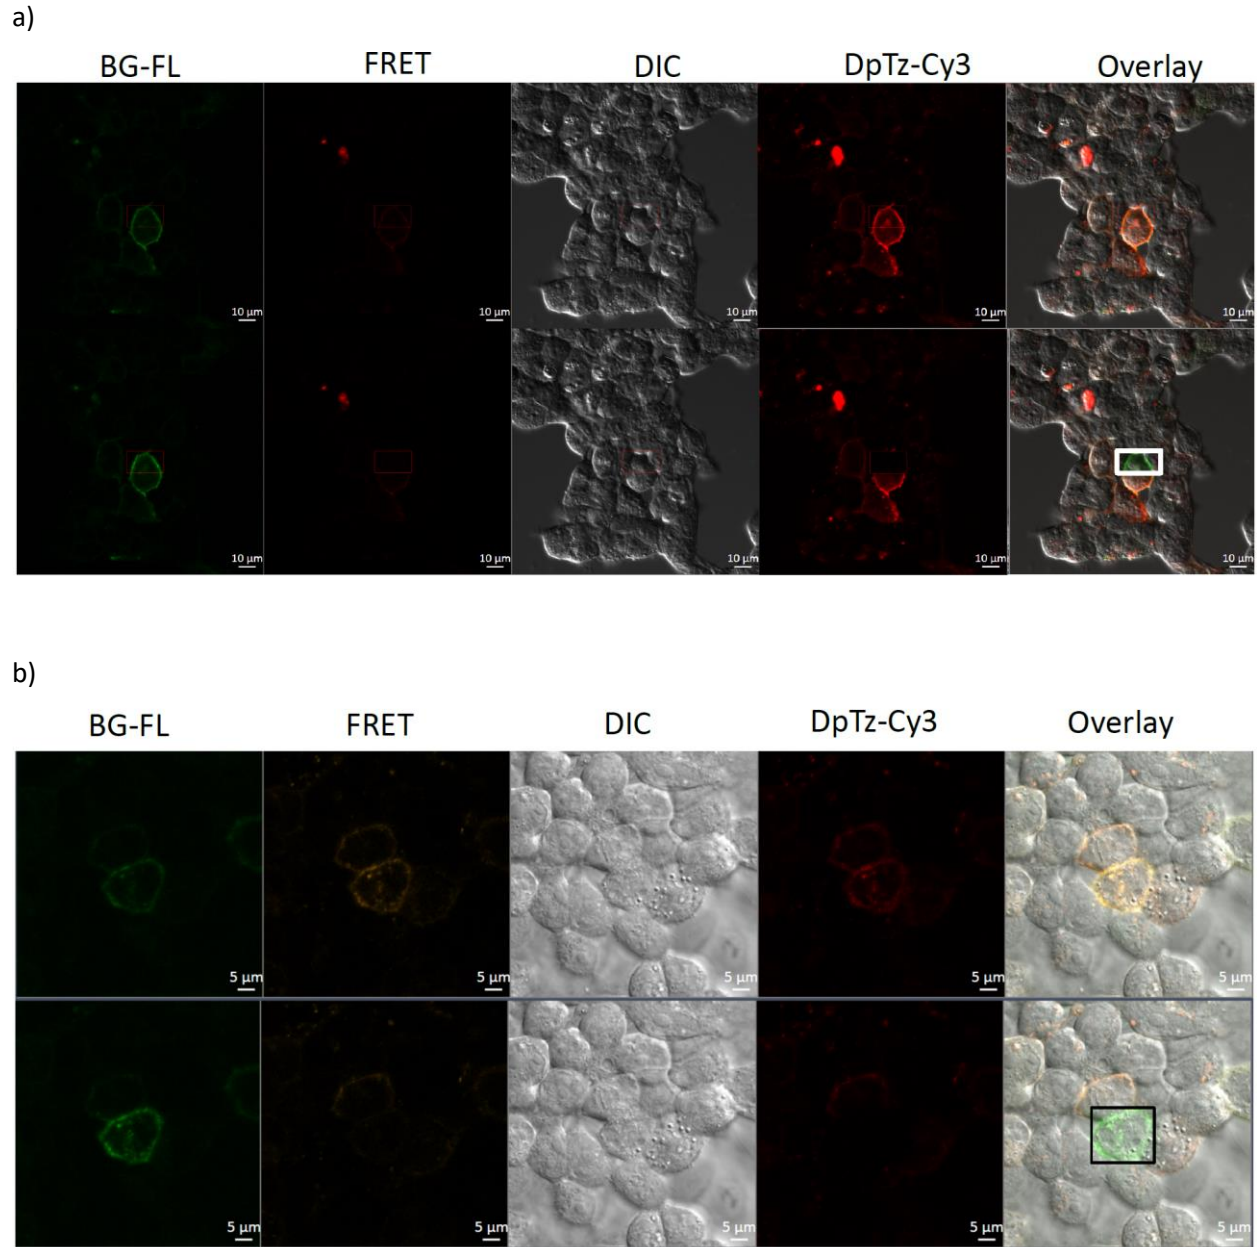

**Figure S8.** Representative confocal micrographs of the dually FL/Cy3-labeled SNAP-GLP-1R-R376 biosensor's response to GLP-1 stimulation: (a) without treatment; (b) with treatment of 10  $\mu$ M GLP-1 for 10 min. Top-row micrographs were acquired before acceptor photobleaching while bottom-row micrographs were acquired after acceptor photobleaching. White boxes mark the photobleaching regions. Scale bar = 5  $\mu$ m.

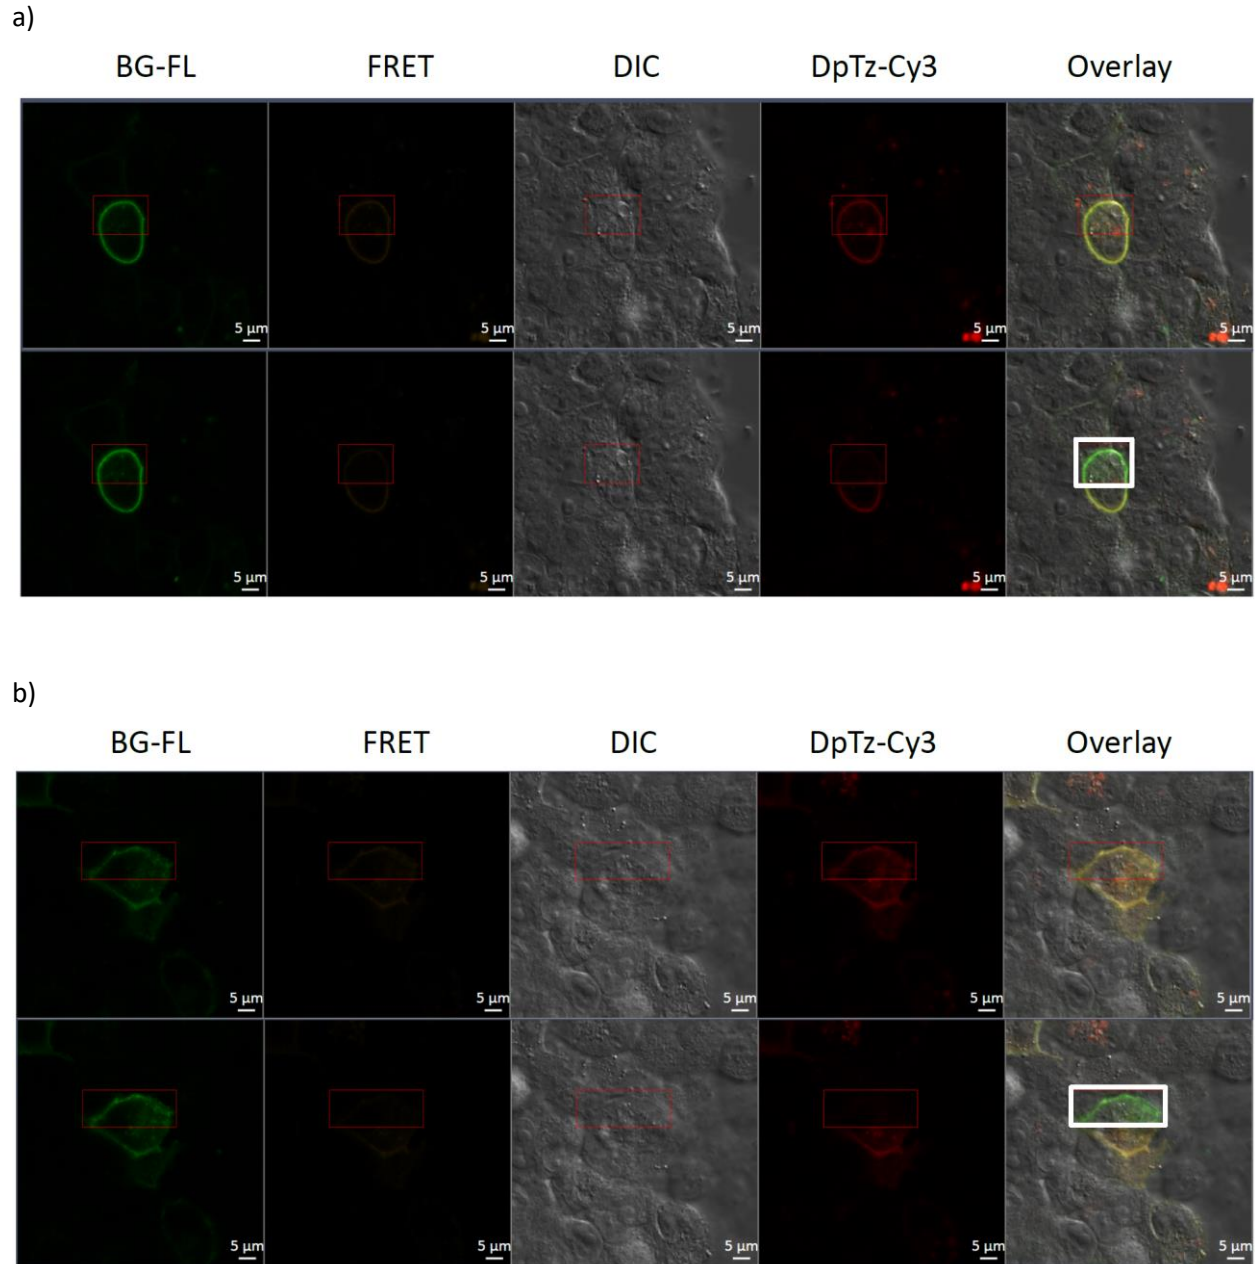

**Figure S9.** Representative confocal micrographs of the dually FL/Cy3-labeled SNAP-GLP-1R-R376 biosensor's response to OXM-7 stimulation: (a) without treatment; (b) with treatment of 10  $\mu$ M OXM-7 for 10 min. Top-row micrographs were acquired before acceptor photobleaching while bottom-row micrographs were acquired after acceptor photobleaching. White boxes mark the photobleaching regions. Scale bar = 5  $\mu$ m.

**Table S1.** Oligonucleotides used for amber mutations of SNAP-GLP-1R

| <b>Amino acid position</b> | <b>Primer sequence</b>                                                                                                                         |
|----------------------------|------------------------------------------------------------------------------------------------------------------------------------------------|
| <b>D59</b>                 | F: 5'- GAGGATCCACCTCCTCCTGCCACA <b>TAG</b> TTGTTCTGCAACCGGACCTTC G -3'<br>R: 5'- CGAAGGTCCGGTTGCAGAACA <b>CTA</b> TGTGGCAGGAGGAGGTGGATCCTC -3' |
| <b>E373</b>                | F: 5'- GTGATGGACT <b>TAG</b> CACGCCCGGGGACCCTGCGCTTC -3'<br>R: 5'- CCGGGCGTG <b>CTA</b> GTCCATCACAAAGGCAAAGATGAC -3'                           |
| <b>H374</b>                | F: 5'- TTTGCCTTTGTGATGGACGAG <b>TAG</b> GCCCCGGGGACCCTGCGCTTC -3'<br>R: 5'- GAAGCGCAGGGTCCCCGGGC <b>CTA</b> CTCGTCCATCACAAAGGCAAA -3'          |
| <b>R376</b>                | F: 5'- GAGCACGC <b>TAG</b> GGGACCCTGCGCTTCATCAAGCTG -3'<br>R: 5'- CAGGGTCCC <b>CTA</b> GGCGTGCTCGTCCATCACAAAGGC -3'                            |
| <b>G377</b>                | F: 5'- CACGCCCG <b>TAG</b> ACCCTGCGCTTCATCAAGCTGTTTAC -3'<br>R: 5'- GCGCAGGG <b>CTA</b> CCGGGCGTGCTCGTCCATCACAAAG -3'                          |
| <b>T378</b>                | F: 5'- GCCCGGGG <b>TAG</b> CTGCGCTTCATCAAGCTGTTTACAG -3'<br>R: 5'- GAAGCGCAG <b>CTA</b> CCCCGGGCGTGCTCGTCCATCAC -3'                            |

## Unnatural amino acids, fluorescent labeling reagents, and peptide ligands

SphK was synthesized by following the published procedure.<sup>3</sup> Bock was purchased from Chem-Impex and used directly in the study. BG-FL, BG-C3, DpTz-FL, DpTz-Cy3, and DpTz-AF647<sup>4</sup> were prepared by following the published procedure.<sup>4</sup> OXM-7 was prepared by following the published procedure.<sup>5</sup>

## SNAP-GLP-1R expression construct

The cloning sites *HindIII* and *NheI* were introduced by PCR into *pCMV6-GLP-1R-myc-DDK* (OriGene) immediately after the signal sequence to make *pCMV6-SP-HN-GLP-1R-myc-DDK* using the following primers:

F: 5'- tcaactaggaccggctagcCGCCCCAGGGTGCCACTG -3'

R: 5'- gatctggcgcgccaagcttGGGGCCGCCCTGCCAC -3'

Mammalian codon-optimized SNAP-tag gene was custom synthesized (GenScript) and cloned into *pCMV6-SP-HN-GLP-1R-myc-DDK* at the N-terminus to make *pCMV6-SNAP-GLP-1R*.

## Amber mutation

Amber codon was introduced into selected positions in GLP-1R by site-directed mutagenesis using Platinum Pfx DNA polymerase (Thermo Fisher Scientific) or Phusion high-fidelity DNA polymerase (New England Biolabs) following the manufacturer's instructions. The primers were listed in Table S1, and the template *pCMV6-SNAP-GLP-1R-myc-DDK* was used in the PCR.

## Determination of FRET efficiency

Using the FRETcalc plug-in in ImageJ, %FRET was calculated using the following equation. The calculation is based on the sum of the fluorescence intensities of all the pixels in the selected region-of-interest (ROI). Essentially, in the FRET pair the acceptor is destroyed which then causes the "de-quenching" of the donor. An increase in the donor fluorescence can be observed.

$$\% FRET = \left( \frac{I_{Donor Postbleaching} - I_{Donor Prebleaching}}{I_{Donor Postbleaching}} \right) \times 100\%$$

## HEK293T Cell Culture and Transfection

HEK293T cells were maintained in a growth medium containing Dulbecco's modified eagle medium (DMEM, Life Technologies) supplemented with 10% (v/v) fetal bovine serum (FBS, Life Technologies) and 10 µg/mL Gentamicin (Life Technologies). Transfection was performed at 70–80% confluency using 3:1 reagent/DNA ratio of Lipofectamine 2000 (Life Technologies) with 2.5 µg of total DNA or polyethylenimine (PEI, Polysciences, Inc.) with 3 µg of total DNA per 35 mm dish. For imaging experiments, cells were kept in an imaging medium (FluoroBrite DMEM supplemented with 10% FBS, 4 mM L-glutamine, and 25 mM HEPES).

### UAA incorporation in HEK293T cells

HEK293T cells were co-transfected with a 1:4 ratio of DNA containing the plasmid of interest: synthetase in 200  $\mu$ L of OPTI-MEM (Life Technologies). The plasmid used contained an amber codon mutation on the protein of interest and the synthetase used was pCMV-mmPlyRS-U6-tRNA that is able to charge Bock and SphK. A 100 mM stock solution of the UAA was first made in DMSO and then diluted to 1 mM using DMEM containing FBS. This solution was filtered through a 0.2  $\mu$ m PES filter. The medium was removed from the cells and the UAA solution was added followed by the addition of the transfection mixture. Cells were incubated for 24 h before imaging.

### Labeling of SNAP-GLP-1R on live cell surface

A fresh solution of BG-FL or BG-Cy3 was prepared by diluting 1 mM stock solution in DMSO to a final concentration of 5  $\mu$ M in 1 mL growth medium and filtered through 0.2  $\mu$ M PES. The solution was added to HEK293T cells expressing SNAP-GLP-1R and then incubated at 37 °C and 5% CO<sub>2</sub> for 30 min. The cells were washed once and incubated in 1 mL growth medium for 2 h before changing to the imaging medium.

### Labeling of SphK-encoded SNAP-GLP-1R on live cell surface

A fresh solution of DpTz-Cy3 or DpTz- AF647 was prepared by diluting 1 mM stock in DMSO to a final concentration of 5  $\mu$ M in 1 mL growth medium and filtered through 0.2  $\mu$ M PES. The solution was added to HEK293T cells expressing SphK-encoded SNAP-GLP-1R and incubated at 37 °C and 5% CO<sub>2</sub> for 1 h. The cells were washed twice and incubated in 1 mL growth medium for 2 h before changing to imaging medium. Confocal imaging was performed using a Zeiss LSM 710 equipped with Plan-Apochromat 20 $\times$ /0.8 M27 or 40 $\times$ /1.3 Oil DIC M27 objective with Ex 490/Em 495-635 for the FL channel, Ex 550/Em 555-680 for the Cy3 channel; Ex 635/Em 640-759 for the AlexaFluor 647 channel.

### Reference:

1. F. Wu, L. Yang, K. Hang, M. Laursen, L. Wu, G. W. Han, Q. Ren, N. K. Roed, G. Lin, M. A. Hanson, H. Jiang, M. W. Wang, S. Reedtz-Runge, G. Song and R. C. Stevens, *Nat Commun*, 2020, **11**, 1272.
2. Y. Zhang, B. Sun, D. Feng, H. Hu, M. Chu, Q. Qu, J. T. Tarrasch, S. Li, T. S. Kobilka, B. K. Kobilka and G. Skiniotis, *Nature*, 2017, **546**, 248-253.
3. Z. Yu and Q. Lin, *J Am Chem Soc*, 2014, **136**, 4153-4156.
4. C. P. Ramil, M. Dong, P. An, T. M. Lewandowski, Z. Yu, L. J. Miller and Q. Lin, *J Am Chem Soc*, 2017, **139**, 13376-13386.
5. A. Muppidi, H. Zou, P. Y. Yang, E. Chao, L. Sherwood, V. Nunez, A. K. Woods, P. G. Schultz, Q. Lin and W. Shen, *ACS Chem Biol*, 2016, **11**, 324-328.
